# Supplementary material for: Amyloid precursor protein drives down-regulation of mitochondrial oxidative phosphorylation independent of amyloid beta
Source: PubMed Central journal article supplement (PMC5574989; doi:10.1038/s41598-017-10233-0), 2017-08-29
Supplement: 41598_2017_10233_MOESM1_ESM.pdf [file 41598_2017_10233_MOESM1_ESM.pdf]

## Supplementary Information

Amyloid precursor protein drives down-regulation of mitochondrial oxidative phosphorylation independent of amyloid beta

M. Isabel G. Lopez Sanchez <sup># 1, 2</sup>, Hayley S. Waugh <sup># 1, 2</sup>, Andrew Tsatsanis<sup>3</sup>, Bruce X. Wong<sup>3, 4</sup>, Jonathan G. Crowston <sup>1, 2</sup> James A. Duce <sup>3, 4</sup> and Ian A. Trounce <sup>1, 2, \*</sup>

<sup>1</sup> Centre for Eye Research Australia, 75 Commercial Road, Melbourne, 3004 Victoria, Australia.

<sup>2</sup> Ophthalmology, University of Melbourne, Department of Surgery.

<sup>3</sup> School of Biomedical Sciences, Faculty of Biological Sciences, University of Leeds, Leeds, West Yorkshire LS2 9JT, United Kingdom.

<sup>4</sup> Oxidation Biology Unit, The Florey Institute of Neuroscience and Mental Health, University of Melbourne, 30 Royal Parade, Parkville, 3052 Victoria, Australia.

# These authors contributed equally to this work.

\* Corresponding author: Ian A. Trounce, Centre for Eye Research Australia, 75 Commercial Road, Melbourne, 3004 Victoria, Australia. E-mail: i.trounce@unimelb.edu.au.

## **Supplementary Methods**

### ***Sample preparation and SDS-PAGE***

Total cellular protein was extracted by homogenization in RIPA buffer (50 mM Tris-HCl pH 7.4, 150 mM NaCl, 1 mM EDTA, 1% Tergitol and 0.1% SDS) supplemented with 10 µg/ml aprotinin, 2 mM Na<sub>3</sub>VO<sub>4</sub> and 1 mM phenylmethylsulfonyl fluoride. Samples were incubated on ice for 30 min prior to centrifugation (18,000 g, 20 min, 4°C) and the supernatant retained. Cell lysates or mitochondrial preparations were heated at 95°C for 5 min (or 37°C for OXPHOS antibodies) and separated on 10% or 12% SDS-PAGE gels. Proteins transferred to nitrocellulose or PVDF membranes (Amersham, GE Healthcare) were blocked in 5% (w/v) skim milk in PBS-T (1X PBS, 0.05% Tween) for 1 h before incubation overnight at 4°C with primary antibodies.

### ***Standard preparation for mtDNA copy number analysis***

ACTB and MT-ND2 standards were produced by PCR using 100 ng DNA template, 1X PCR buffer, 100 µM dNTPs, 1.5 mM MgCl<sub>2</sub> (all from Invitrogen), 0.5 µM of each of the forward and reverse primers (ACTB forward 5'-GCAGAAGGAGATCACTGC-3' and reverse 5'-TAAAGCCATGCCAATCTC-3'; MT-ND2 forward 5'-ATTAATCCCCTGGCCCAA-3' and reverse 5'-GAAGGATTATGGATGCGGTT-3'), 2 U Taq Polymerase (Invitrogen) and ultrapure H<sub>2</sub>O (Sigma-Aldrich), followed by purification of the PCR products using a GenElute PCR Clean-Up Kit (Sigma-Aldrich, Cat. # NA-1020), and sequenced to confirm the specific amplification of the MT-ND2 and ACTB targets. Standards were prepared by 10-fold serial dilution (1 x 10<sup>-2</sup> ng/µl to 1 x 10<sup>-7</sup> ng/µl) of the target-specific purified PCR product. MT-ND2 and ACTB probes were run individually and in duplex reactions using 10-fold dilution series of a control DNA sample to confirm reproducibility and that amplification efficiency was the same in single or duplex reactions.

## Supplementary Tables and Figures

**Supplementary Table 1.** Antibodies used in this study

| Antibody                                                        | Supplier               | Catalogue # | Dilution used      |
|-----------------------------------------------------------------|------------------------|-------------|--------------------|
| Anti-Alzheimer precursor protein A4, N-term specific 22C11      | Millipore              | MAB348      | 1:2000             |
| Anti-amyloid $\beta$ antibody clone WO-2                        | Millipore              | MABN10      | 1:2000<br>or 1:200 |
| Anti- $\beta$ -Amyloid, 1-16 antibody                           | BioLegend              | 803001      | N/A                |
| Anti-actin clone AC-40                                          | Sigma-Aldrich          | A3853       | 1:5000             |
| Anti-VDAC1/Porin                                                | Abcam                  | ab14734     | 1:5000             |
| MitoProfile Total OXPHOS cocktail                               | MitoSciences           | MS604       | 1:2000             |
| Anti-SDHA                                                       | Abcam                  | ab14715     | 1:5000             |
| Anti-COX2                                                       | Abcam                  | ab110258    | 1:5000             |
| Anti-COX5A                                                      | Abcam                  | ab110262    | 1:5000             |
| Anti-mouse horseradish peroxidase-conjugated secondary antibody | Amersham GE Healthcare | NA931V      | 1:10,000           |

**Supplementary Table 2.** Gene expression assays used in this study

| Gene target | Assay catalogue # |
|-------------|-------------------|
| MT-ND1      | Hs02596873        |
| MT-ND4      | Hs02596876        |
| MT-ND6      | Hs02596879        |
| MT-CO1      | Hs02596864        |
| MT-CO3      | AIY9ZY3           |
| MT-ATP6     | Hs02596862        |
| MT-CYB      | Hs02596867        |
| NDUFS3      | Hs01549083        |
| COX4I1      | Hs00971639        |
| ACTB        | Hs03023880        |
| HPRT1       | Hs02800695        |

### Supplementary Table 3. Respiration in control cells upon bIV treatment

|       | <b>Control untreated</b> | <b>Control + bIV</b> |
|-------|--------------------------|----------------------|
| Leak  | 9.32 ± 0.2               | 8.51 ± 1.7           |
| CI    | 11.12 ± 0.5              | 8.40 ± 2.2           |
| CI+II | 13.88 ± 1.1              | 10.34 ± 2.2 *        |
| Max   | 10.89 ± 0.8              | 9.12 ± 1.5           |

Convergent complex I+II respiration is decreased in control cells incubated with 1  $\mu$ M  $\beta$ -secretase inhibitor IV (bIV) for 24 h relative to untreated control. Data is presented as mean  $\pm$  SD (n = 3); \*  $P < 0.05$  by paired, two-tailed Student's  $t$ -test.

## Supplementary Figure 1

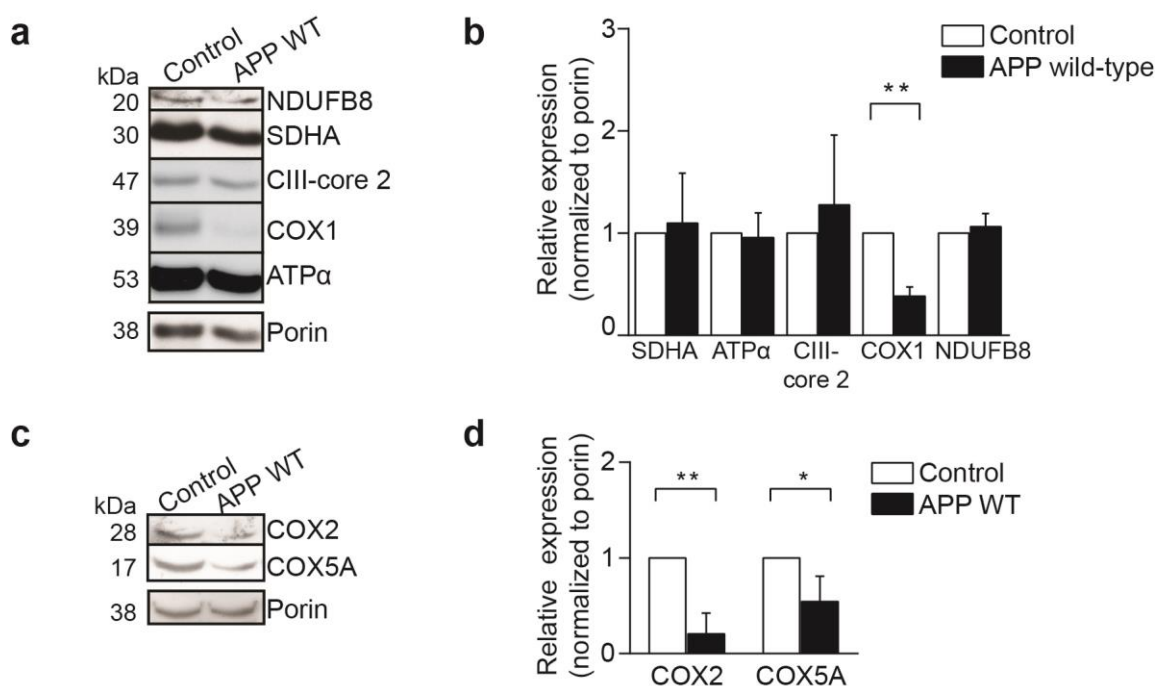

### OXPHOS complex IV protein levels are decreased in mitochondria from APP wild-type cells

**a)** Representative immunoblot of OXPHOS protein levels in mitochondrial preparations from cells expressing APP wild-type (APP WT) compared to control. Porin was used as a loading control. **b)** Densitometric analysis of immunoblot images showing a significant decrease in the expression of mtDNA-encoded COX1. **c)** Representative immunoblot and **d)** Densitometric measurements show a significant decrease in the expression of additional complex IV protein subunits; mtDNA-encoded COX2 and nuclear DNA-encoded COX5A, in mitochondrial preparations from APP wild-type (APP WT) cells compared to control. Porin was used as a loading control. All data is presented as mean  $\pm$  SD ( $n = 3$ ); \*  $P < 0.05$  and \*\*  $P < 0.01$  by paired, two-tailed Student's  $t$ -test.
